# Supplementary material for: NIR-II Absorbing Conjugated Polymer Nanotheranostics for Thermal Initiated NO Enhanced Photothermal Therapy
Source: MDPI journal article supplement (doi:10.3390/bios13060642), 2023-06-12
Supplement: s1 [file s1]

Supporting Information

# NIR-II Absorbing Conjugated Polymer Nanotheranostics for Thermal Initiated NO Enhanced Photothermal Therapy

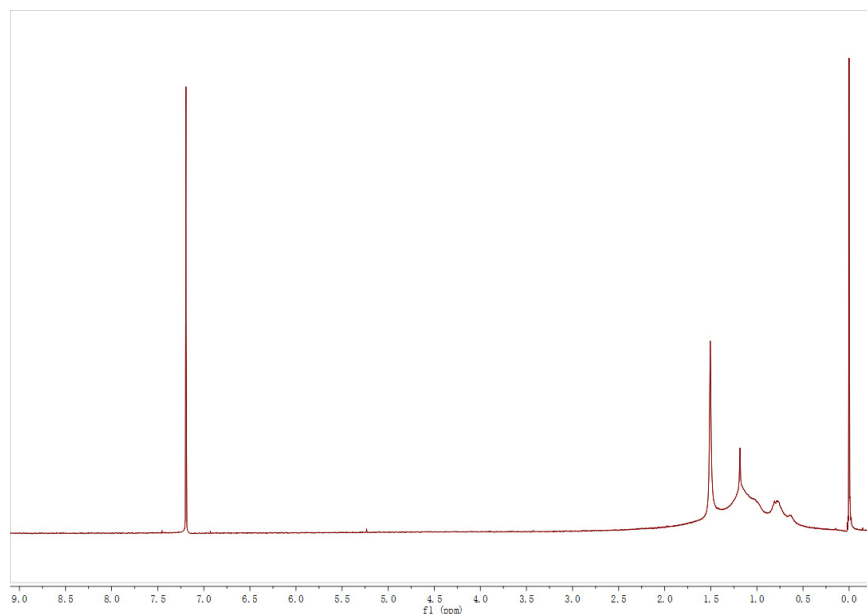

**Figure S1.**  $^1\text{H}$  NMR spectra of IN-NDI polymer.

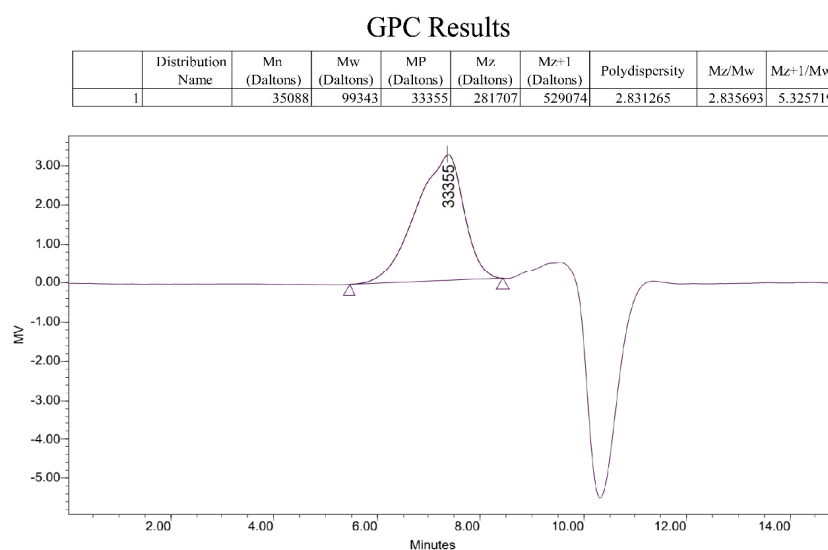

**Figure S2.** Gel permeation chromatography (GPC) of IN-NDI polymer.

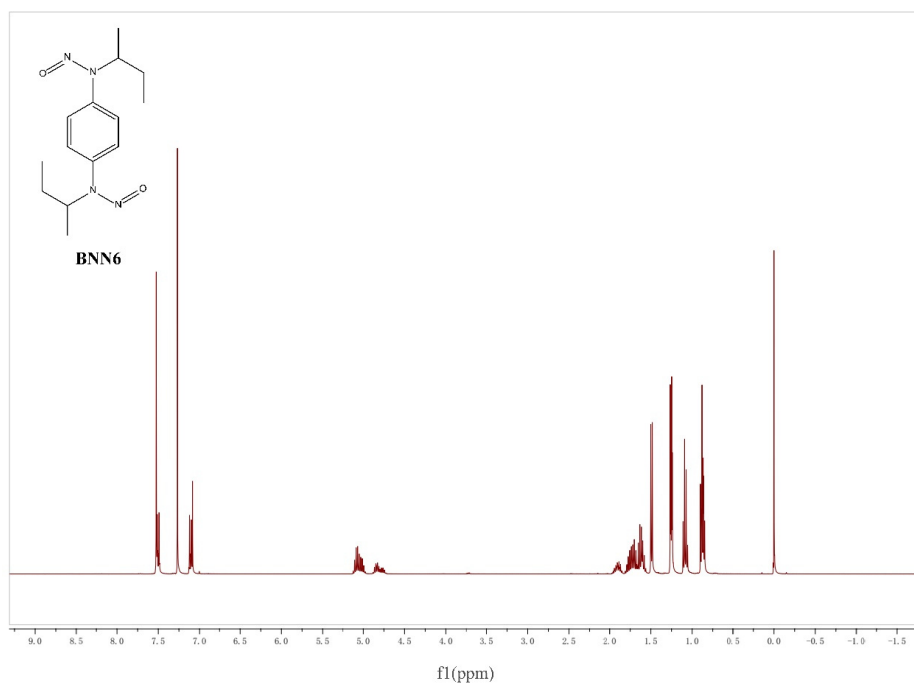

**Figure S3.**  $^1\text{H}$  NMR spectra of the product BNN6:  $\delta$  = 7.52 (4H), 4.95-4.69 (2H), 2.00-1.84 (2H), 1.81-1.69 (2H), 1.48 (t,  $J$ =7.6Hz, 6H), 1.08(td,  $J$ =7.4, 5.3Hz, 6H).

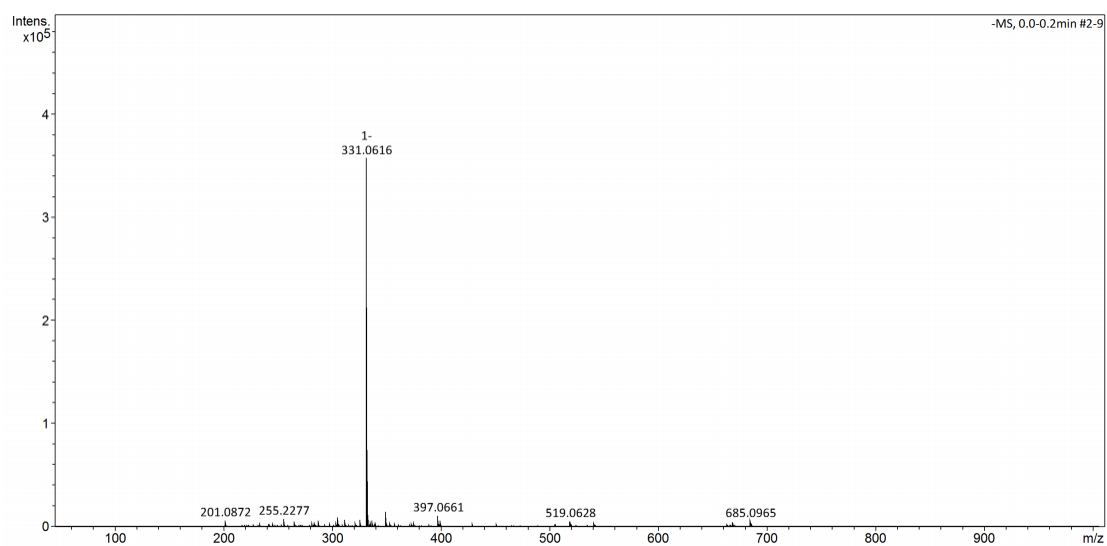

**Figure S4.** The MS of synthesized BNN6.MS (ESI $^+$ ): calcd for  $\text{C}_{14}\text{H}_{22}\text{N}_4\text{O}_2\text{Na}$ , 301.1635  $[\text{M} + \text{Na}]^+$ ; found 301.1631  $[\text{M} + \text{Na}]^+$ .

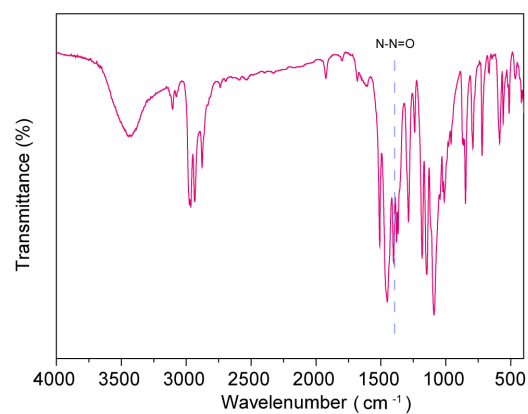

**Figure S5.** FT-IR spectra of BNN6: the feature N-N=O vibration band at the wavenumber of 1451  $\text{cm}^{-1}$ .

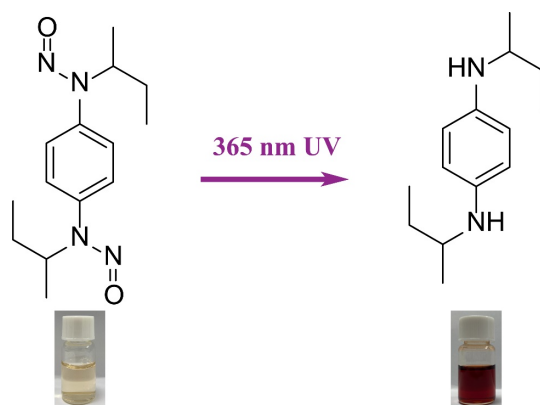

**Figure S6.** The photodecomposition route of BNN6 with 365 nm UV irradiation and the color change during decomposition (digital pictures).

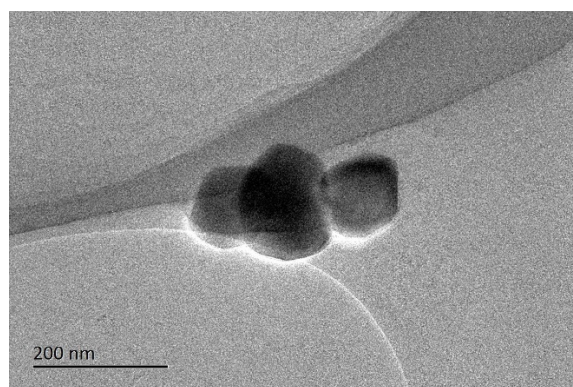

**Figure S7.** Representative TEM images of CPNPs.

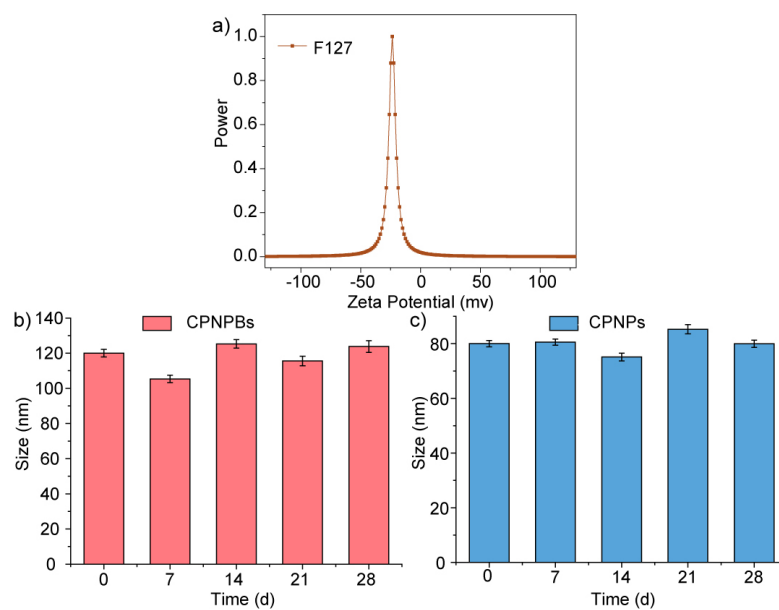

**Figure S8.** (a) The  $\zeta$ -potential of pure F127. (b) The hydrodynamic diameter of CPNPBs versus the storage time at room temperature. (c) The hydrodynamic diameter of CPNPs versus the storage time at room temperature.

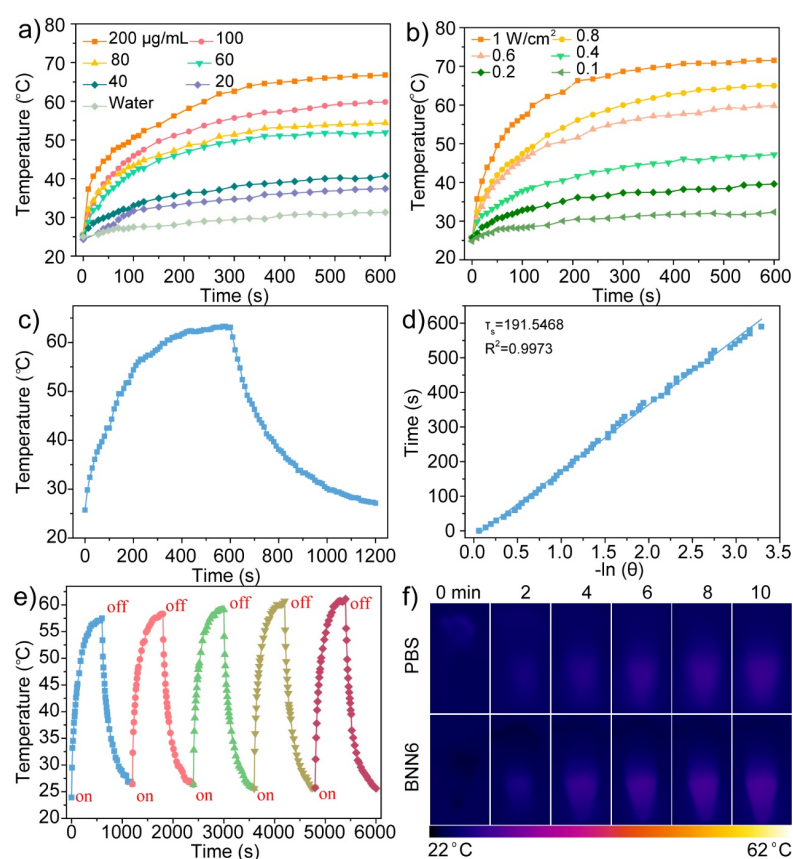

**Figure S9.** a) Concentration-dependent photothermal curves of CPNPs under 1064 nm laser irradiation. b) Photothermal heating curves of CPNPs dispersions (100  $\mu\text{g/mL}$ ) irradiated using a 1064 nm laser at varied power densities (0.1, 0.2, 0.6, 0.8, 1.0  $\text{W/cm}^2$ ). c) The photothermal effect of CPNPs aqueous solution (100  $\mu\text{g/mL}$ ) excited with 1064 nm laser. d) Linear relationship curves between time (s) versus  $-\ln \theta$  based on panel e. e) Temperature elevation of CPNPs dispersion under five on/off cycles. f) Photothermal IR images of PBS and BNN6 under 1064 nm laser irradiation for 10 min.
